# Supplementary material for: Canine Gastric Carcinomas: A Histopathological and Immunohistochemical Study and Similarities with the Human Counterpart
Source: MDPI journal article supplement (doi:10.3390/ani11051409), 2021-05-14
Supplement: s1 [file s1]

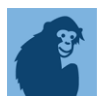**Supplementary table 1:** 149 cases of canine gastric carcinoma by sex and breed frequency.

| Breed                             | M            | F            | Total | Breed% |
|-----------------------------------|--------------|--------------|-------|--------|
| 1. Staffordshire Bull Terrier     | 16           | 6            | 22    | 14.8   |
| 2. Cross breed                    | 9            | 6            | 15    | 10.1   |
| 3. Labrador Retriever             | 3            | 8            | 12    | 8.1    |
| 4. Golden Retriever               | 4            | 6            | 10    | 6.7    |
| 5. Boxer                          | 3            | 5            | 9     | 6      |
| 6. Border Collie                  | 1            | 6            | 8     | 5.4    |
| 7. Belgian Shepherd Dog           | 1            | 4            | 6     | 4      |
| 8. Rough Collie                   | 3            | 3            | 6     | 4      |
| 9. West Highland White Terrier    | 3            | 2            | 5     | 3.4    |
| 10. Collie                        | X            | 3            | 3     | 2      |
| 11. Dalmatian                     | 2            | 1            | 3     | 2      |
| 12. Leonberger                    | 1            | 2            | 3     | 2      |
| 13. Bearded Collie                | 1            | 1            | 2     | 1.3    |
| 14. Husky                         | 2            | X            | 2     | 1.3    |
| 15. Jack Russell Terrier          | 2            | X            | 2     | 1.3    |
| 16. Labradoodle                   | 1            | 1            | 2     | 1.3    |
| 17. Lhasa Apso                    | 1            | 1            | 2     | 1.3    |
| 18. Standard Poodle               | 1            | 1            | 2     | 1.3    |
| 19. Cocker Spaniel                | 2            | X            | 2     | 1.3    |
| 20. Chow Chow                     | 2            | X            | 2     | 1.3    |
| 21. German Shepherd Dog           | 1            | 1            | 2     | 1.3    |
| 22. English Springer Spaniel      | 1            | X            | 1     | 0.7    |
| 23. Basset Hound                  | 1            | X            | 1     | 0.7    |
| 24. Blue Heeler                   | X            | 1            | 1     | 0.7    |
| 25. Bull mastiff                  | X            | 1            | 1     | 0.7    |
| 26. Cavalier King Charles Spaniel | 1            | X            | 1     | 0.7    |
| 27. Dachshund                     | 1            | X            | 1     | 0.7    |
| 28. English bull terrier          | 1            | X            | 1     | 0.7    |
| 29. Flat-Coated Retriever         | X            | 1            | 1     | 0.7    |
| 30. French Bulldog                | 1            | X            | 1     | 0.7    |
| 31. Giant Schnauzer               | X            | 1            | 1     | 0.7    |
| 32. Gordon Setter                 | X            | 1            | 1     | 0.7    |
| 33. Irish Red Setter              | X            | 1            | 1     | 0.7    |
| 34. Keeshond                      | X            | 1            | 1     | 0.7    |
| 35. Lurcher                       | X            | 1            | 1     | 0.7    |
| 36. Miniature Schnauzer           | X            | 1            | 1     | 0.7    |
| 37. Newfoundland                  | X            | 1            | 1     | 0.7    |
| 38. Norwegian Elkhound            | 1            | X            | 1     | 0.7    |
| 39. Parson Russell Terrier        | Not recorded | Not recorded | 1     | 0.7    |

---

|                         |   |   |            |             |
|-------------------------|---|---|------------|-------------|
| 40. Pointer             | 1 | X | 1          | 0.7         |
| 41. Rhodesian Ridgeback | 1 | X | 1          | 0.7         |
| 42. Samoyed             | 1 | X | 1          | 0.7         |
| 43. Scottish Terrier    | 1 | X | 1          | 0.7         |
| 44. St. Bernard         | 1 | X | 1          | 0.7         |
| 45. Tibetan Spaniel     | X | 1 | 1          | 0.7         |
| 46. Weimaraner          | 1 | X | 1          | 0.7         |
| 47. Spitz               | 1 | X | 1          | 0.7         |
| 48. American Bulldog    | 1 | X | 1          | 0.7         |
| 49. Epagneul breton     | X | 1 | 1          | 0.7         |
| 50. Shar-pei            | 1 | X | 1          | 0.7         |
| <b>Total</b>            | - | - | <b>149</b> | <b>100%</b> |

---
